# Supplementary material for: Electronic metal–support interactions enhance the ammonia synthesis activity over ruthenium supported on Zr-modified CeO2 catalysts
Source: Royal Society of Chemistry journal article supplement (doi:10.1039/c6ra10540h), 2016-01-01
Supplement: c6ra10540h1.pdf [file c6ra10540h1.pdf]

## **Electronic Metal–Support Interactions Enhance the Ammonia Synthesis Activity over Ruthenium Supported on Zr-modified CeO<sub>2</sub> catalysts**

Zhanwei Ma,<sup>ab</sup> Xumao Xiong,<sup>a</sup> Chengli Song<sup>a</sup>, Bin Hu<sup>a\*</sup> and Weiqiang Zhang<sup>c</sup>

<sup>a</sup> State Key Laboratory for Oxo Synthesis and Selective Oxidation, Lanzhou Institute of Chemical Physics, Chinese Academy of Sciences, Lanzhou 730000, China

<sup>b</sup> University of Chinese Academy of Sciences, Beijing 100049, China

<sup>c</sup> Changchun Zhongke Haorong New Material Research Co., Ltd.

Corresponding author,

E-mail: Hcom@licp.cas.cn

---

## 1. Experimental section

### 1.1 Materials and Instruments

All chemicals were analytical grade and used directly without any further purification. They were purchased from Aladdin Industrial Corporation in China. Deionized water with a resistivity of 18.25 M $\Omega$ .cm was used in all reactions.

The crystalline structure of the samples was analyzed by X-ray powder diffraction (XRD) (X'pert, PANalytical, Dutch) using Cu K $\alpha$  radiation ( $\lambda = 1.54050 \text{ \AA}$ ). Transmission electron microscope (TEM) experiments were conducted in a JEM-2010 TEM with an accelerating voltage of 200 KV. Temperature programmed reduction (TPR) profiles of the samples were generated on a TP-5080 catalyst characterization instrument. H<sub>2</sub>/Ar (10 % of H<sub>2</sub>) mixture was used as the reducing gas and heated at a linear heating ramp of 10 K/min from 298 to 1173 K. UV-visible diffuse reflectance spectra were taken on a UV-2550 (Shimadzu) spectrometer using BaSO<sub>4</sub> as the reference. The element composition was detected by X-ray photoelectron spectrometer (XPS, ESCALAB 250Xi). The photoluminescence (PL) spectra were detected with an F-7000 spectrofluorometer (Hitachi High-Technologies, Tokyo, Japan). Raman spectra of samples were recorded on Renishaw RM1000 ( $\lambda = 514.5 \text{ nm}$ ). The percentage composition of Ru was determined by XRF on MagixPW2403.

### 1.2 Support and catalyst preparation

Ce<sub>x</sub>Zr<sub>1-x</sub>O<sub>2</sub> supports were synthesized with different Ce/(Ce+Zr) molar ratios ( $x = 0, 0.6, 0.8, \text{ and } 1.0$ ) via a citric acid sol-gel process using Ce(NO<sub>3</sub>)<sub>3</sub>·6H<sub>2</sub>O and Zr(NO<sub>3</sub>)<sub>4</sub>·4H<sub>2</sub>O as precursors. First, the solutions of Ce(NO<sub>3</sub>)<sub>3</sub>·6H<sub>2</sub>O and Zr(NO<sub>3</sub>)<sub>4</sub>·4H<sub>2</sub>O

---

in deionized water (total amount of Ce and Zr = 5 mmol, molar ratio of  $\text{Ce}^{3+}/(\text{Ce}^{3+}+\text{Zr}^{4+}) = x$ , 30 mL) were poured into a 100-mL beaker. A solution of citric acid in deionized water (0.5 mmol/mL, 10 mL) was then directly added with stirring. The mixture was stirred for a further 12 h at room temperature, and then the xerogel was obtained after the solvent was evaporated at 383 K. The xerogel was then calcined at 823 K in air for 4 h. The support was heated at 2.3 K/min from room temperature to 573 K, held at 573 K for 30 min, then heated at a rate of 4 K/min from 573 to 823 K.

The supports  $\text{Ce}_x\text{Zr}_{1-x}\text{O}_2$  were stirred with a solution of ruthenium carbonyl in THF at room temperature for 12 h in a rotary evaporator. Then, the THF solvent was removed under reduced pressure at 303 K. The gray powder was calcined at 573 K for 3 h under hydrogen atmosphere, followed by cooling in hydrogen atmosphere to room temperature.

### **Measurements of catalytic activity**

In ammonia synthesis reaction, 0.2 g catalyst samples were used for each experiment. A stainless steel reactor with an inner diameter of 6 mm was used. The catalyst was first heated in mixture of  $\text{N}_2:\text{H}_2$  (1:3) to 673 K at a heating rate of 5 K/min and then held at 673 K for 2 h. Finally the temperature was adjusted to the required value for the ammonia synthesis reaction. The mixture of  $\text{N}_2:\text{H}_2$  (1:3) with a flow rate of 60 mL/min was used as reactant. All the reactions were performed at pressure 1 MPa. A Shimadzu GC-8A gas chromatograph equipped with a TCD was employed to measure the composition of product gas. Argon was used as the carrier gas.

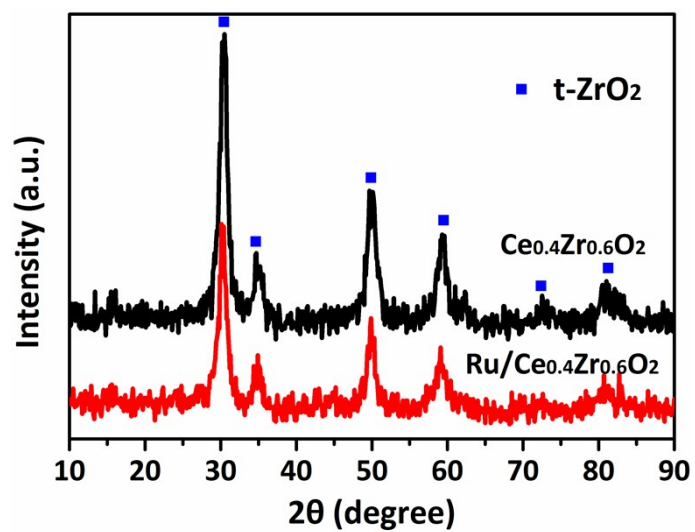

Figure S1. the XRD patterns of  $\text{Ce}_{0.4}\text{Zr}_{0.6}\text{O}_2$  and  $\text{Ru}/\text{Ce}_{0.4}\text{Zr}_{0.6}\text{O}_2$

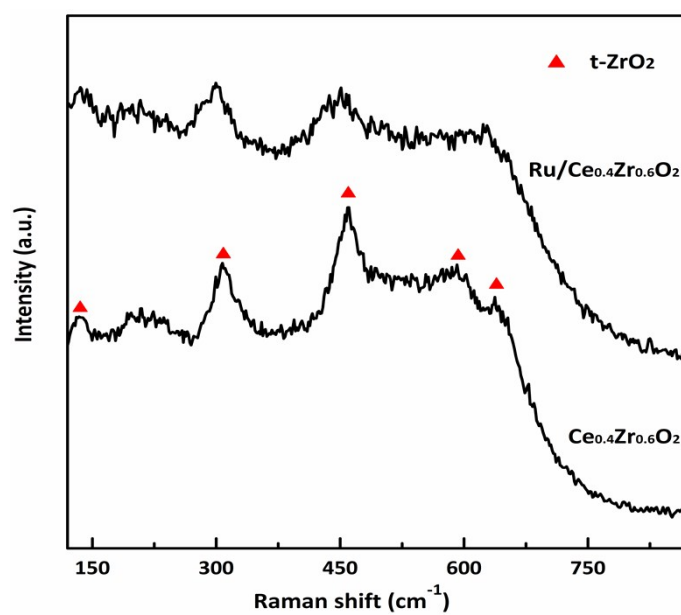

Figure S2. the Raman spectra of  $\text{Ce}_{0.4}\text{Zr}_{0.6}\text{O}_2$  and  $\text{Ru}/\text{Ce}_{0.4}\text{Zr}_{0.6}\text{O}_2$

**Table S1. The microstrain of the  $\text{Ce}_x\text{Zr}_{1-x}\text{O}_2$  and  $\text{Ru}/\text{Ce}_x\text{Zr}_{1-x}\text{O}_2$**

| Sample                                               | Ru (wt%) | Microstrain (%) |         |         |
|------------------------------------------------------|----------|-----------------|---------|---------|
|                                                      |          | (1 1 1)         | (2 0 0) | (2 2 0) |
| $\text{CeO}_2$                                       |          | 0.50            | 0.42    | 0.32    |
| $\text{Ce}_{0.8}\text{Zr}_{0.2}\text{O}_2$           |          | 2.49            | 1.86    | 1.55    |
| $\text{Ce}_{0.6}\text{Zr}_{0.4}\text{O}_2$           |          | 2.68            | 2.19    | 1.69    |
| $\text{Ru}/\text{CeO}_2$                             | 3.84     | 0.46            | 0.39    | 0.3     |
| $\text{Ru}/\text{Ce}_{0.8}\text{Zr}_{0.2}\text{O}_2$ | 3.92     | 2.25            | 1.62    | 1.52    |
| $\text{Ru}/\text{Ce}_{0.6}\text{Zr}_{0.4}\text{O}_2$ | 3.87     | 2.52            | 1.94    | 1.60    |

The Results of microstrain ( $\epsilon$ )obtained from the Equation<sup>1</sup> (1):

$$\frac{\beta \cos \theta}{\lambda} = \frac{1}{D} + 4\epsilon \frac{\sin \theta}{\lambda} \quad (1)$$

$\beta$ : full width at half maximum (FWHM),       $\theta$  : the Bragg angle

$D$ : size of coherently diffracting domains

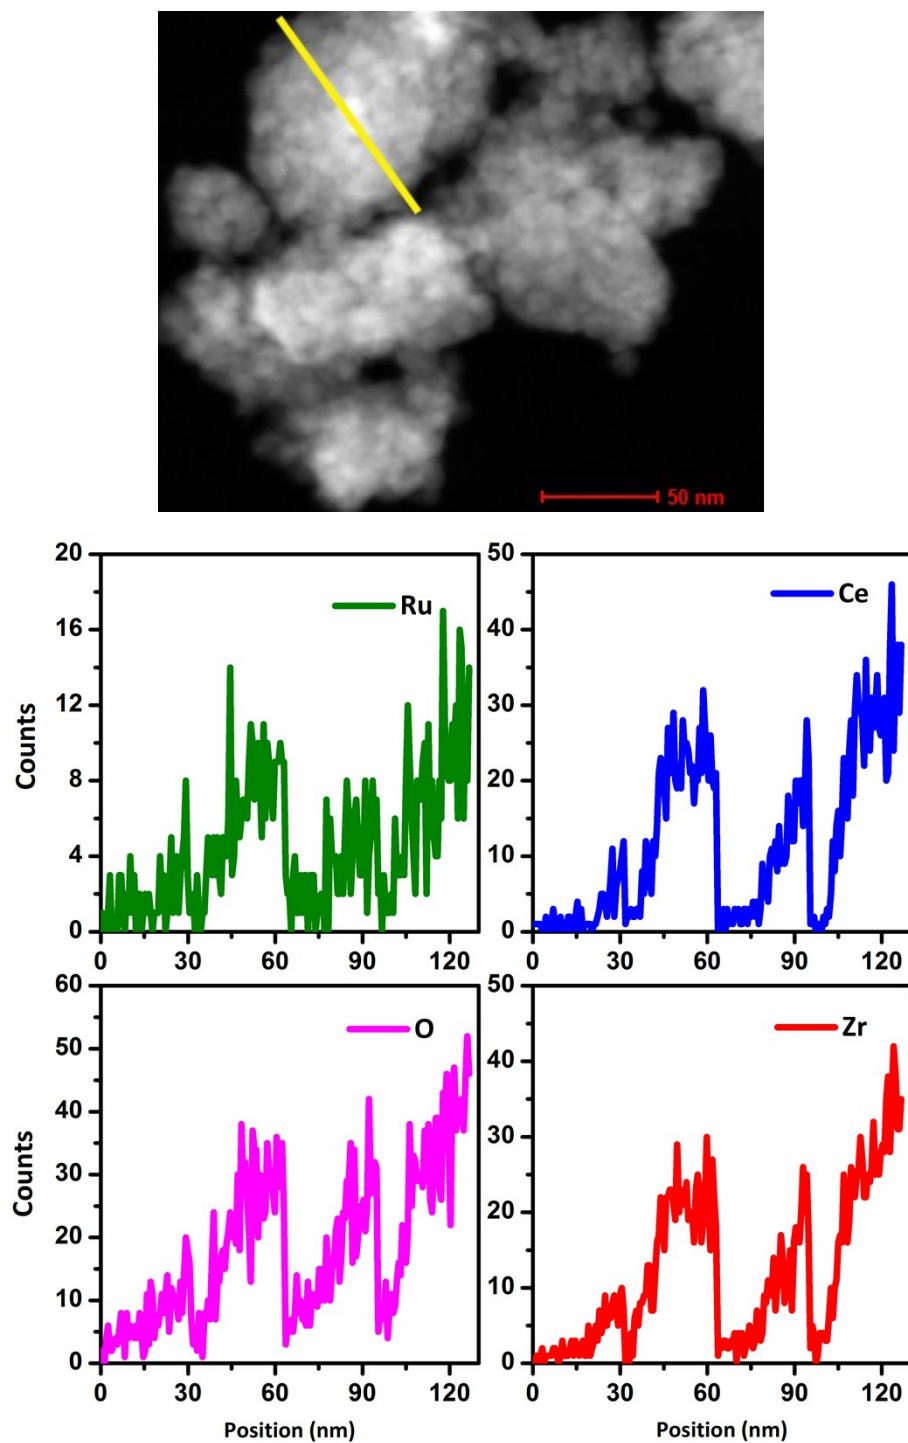

Figure S3. HAADF-STEM image of Ru/Ce<sub>0.6</sub>Zr<sub>0.4</sub>O<sub>2</sub> and distribution of components in randomly selected area in (a) by a line-scan EDS analysis.

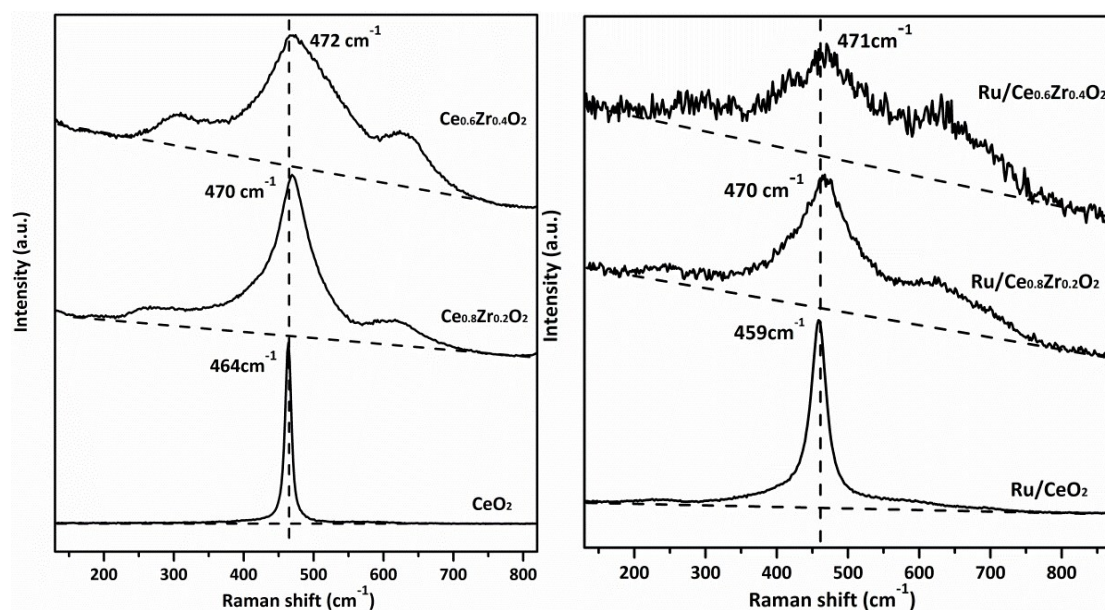

Figure S4. Raman spectra of the support  $\text{Ce}_x\text{Zr}_{1-x}\text{O}_2$  and the corresponding catalysts.

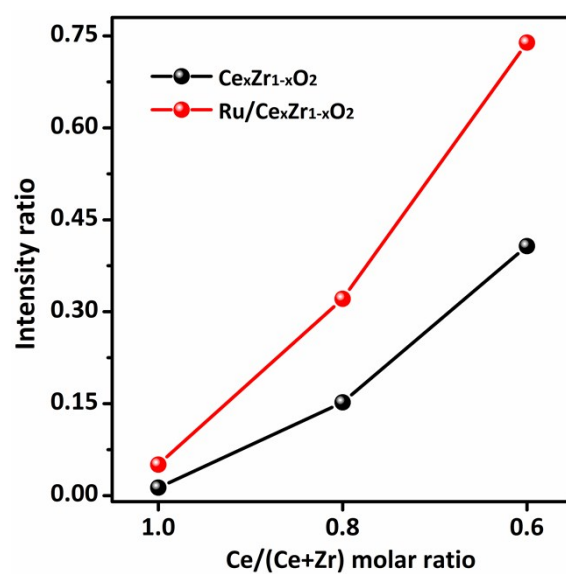

Figure S5. The  $I_D/I_{F2g}$  values of  $\text{Ce}_x\text{Zr}_{1-x}\text{O}_2$  and the corresponding catalysts

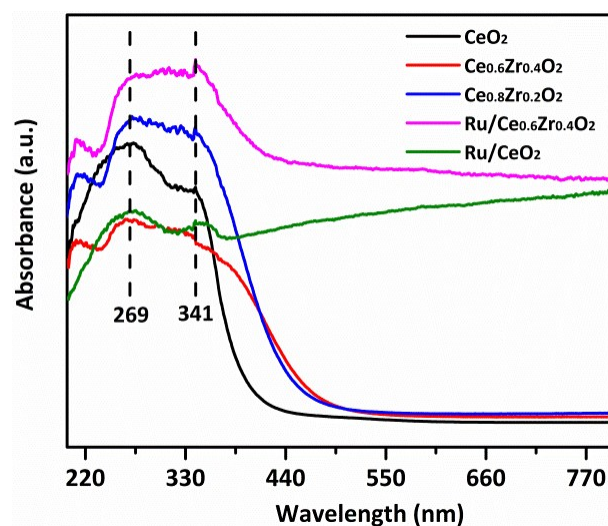

Figure S6. UV-vis diffuse reflectance spectra of the supports and the corresponding catalysts.

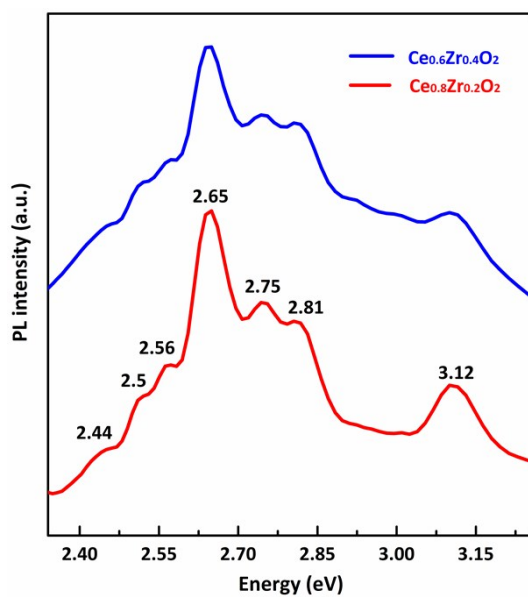

Figure S7. PL spectra of the supports and the corresponding catalysts.



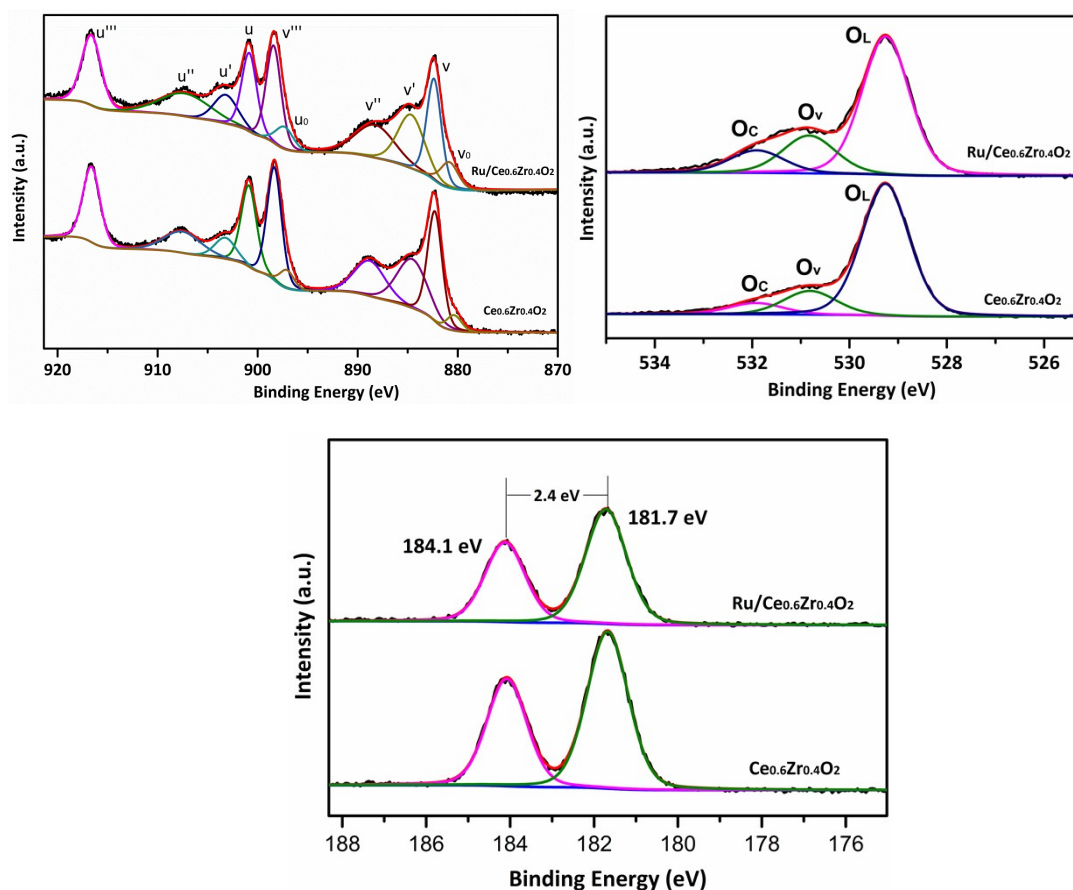

**Figure S8. XPS spectra of  $\text{Ce}_{0.6}\text{Zr}_{0.4}\text{O}_2$  and  $\text{Ru}/\text{Ce}_{0.6}\text{Zr}_{0.4}\text{O}_2$ .**

The O 1s could be fitted with three peaks<sup>2</sup> at 529.3 eV ( $\text{O}_\text{L}$ ), 530.8 eV ( $\text{O}_\text{v}$ ) and 531.9 eV ( $\text{O}_\text{c}$ ). The  $\text{O}_\text{L}$  component of the O 1s peak is attributed to lattice oxygen bound to metal cations, the  $\text{O}_\text{v}$  component at 530.8 eV is associated with  $\text{O}^{2-}$  in oxygen-deficient regions. And the  $\text{O}_\text{c}$  component is attributed to chemisorbed and dissociated oxygen species or OH. As could be observed in the Figure S8, the binding energies of Zr  $3\text{d}_{5/2}$  and  $3\text{d}_{3/2}$  were around 182.5 eV and 184.9 eV, which were in good agreement with previous reports<sup>3</sup> and corresponded to Zr in 4+ oxidation state.

**Table S2.** the relative amount of different components.

| Sample                                                | Ce <sup>4+</sup> | Ce <sup>3+</sup> | O <sub>C</sub> | O <sub>V</sub> | O <sub>L</sub> | Ru <sup>0</sup> | Ru <sub>n</sub> <sup>+</sup> | Ru <sub>n</sub> <sup>-</sup> |
|-------------------------------------------------------|------------------|------------------|----------------|----------------|----------------|-----------------|------------------------------|------------------------------|
| Ce <sub>0.6</sub> Zr <sub>0.4</sub> O <sub>2</sub>    | 76.0%            | 24.0%            | 7.6%           | 15.4%          | 77.0%          | -               | -                            | -                            |
| Ru/Ce <sub>0.6</sub> Zr <sub>0.4</sub> O <sub>2</sub> | 70.2%            | 29.8%            | 12.5%          | 20.4%          | 67.1%          | 45.6%           | 34.1%                        | 20.3%                        |

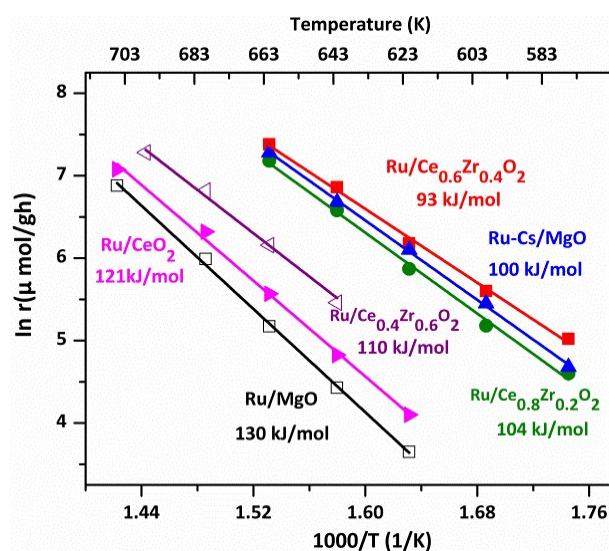

**Figure S9.** Apparent activation energies for ammonia synthesis over various 4 wt% Ru-loaded catalysts. Reaction conditions: catalyst, 0.2 g; H<sub>2</sub>/N<sub>2</sub>=3 with a flow rate of 60 ml/min; pressure, 1 MPa.

---

## References

1. Y. Luo, A. Habrioux, L. Calvillo, G. Granozzi and N. Alonso-Vante, *ChemCatChem*, 2015, **7**, 1573-1582.
2. J. C. Dupin, D. Gonbeau, P. Vinatier and A. Levasseur, *Phys. Chem. Chem. Phys.*, 2000, **2**, 1319-1324.
3. B. M. Reddy, A. Khan, Y. Yamada, T. Kobayashi, S. Loridant and J. C. Volta, *J. Phys. Chem. B*, 2003, **107**, 11475-11484.
